# Supplementary material for: Blended and Layered Configurations: Tuning High and Low Frequency Broadband Absorption in Magnetic-Electro Coupling Composites Foam Consisting with Carbonyl iron flaky and Carbon nanotube
Source: Research Square preprint supplement (doi:10.21203/rs.3.rs-6954408/v1), 2025-07-31
Supplement: Supplementary file 1 [file fad50f7f2b57a7a576c67a1d.docx]

**Blended- and Layered- Configurations: Tuning High and Low Frequency Broadband Absorption in Magnetic-Electro Coupling Composites Foam Consisting with Carbonyl iron flaky and Carbon nanotube**

Zirui Yua,b, Danfeng Zhouc[[1]](#footnote-1),Shanshan Lic, Huan Yuana,d, Yuanlu Xionga,b, Guoqiang Luoa,b, Qiang Shena,b[[2]](#footnote-2)

a Sanya Science and Education Innovation Park of Wuhan University of Technology, Sanya 572024, PR China

b State Key Laboratory of Advanced Technology for Materials Synthesis and Processing, Wuhan University of Technology, Wuhan 430070, PR China

c Hubei Key Laboratory of Plasma Chemistry and New Materials, School of Material Science and Engineering, Wuhan Institute of Technology, Wuhan 430205, Hubei, PR

China

d School of Automotive Engineering, Wuhan University of Technology, Wuhan 430070, PR China

**1. The preparation pression of composites**

Fig.S1 shows the preparation process of CNT/PS, CIF/PS and CIF/CNT/PS composites. Firstly, the 30g PS particles were immersed in 100 ml DMF and stirred at 160 oC for 20 min. Secondly, the CNT and CIF particles were added in PS heat solution and stirred at 200 oC for 30 min to obtain CNT/PS, CIF/PS and CIF/CNT/PS sol, respectively. And then, these sols were rapidly poured into 1000 ml anhydrous ethanol, respectively to obtain flocculent precipitates. Next, the flocculent precipitates were freeze-dried to obtain the CNT/PS, CIF/PS and CIF/CNT/PS composites samples.

**
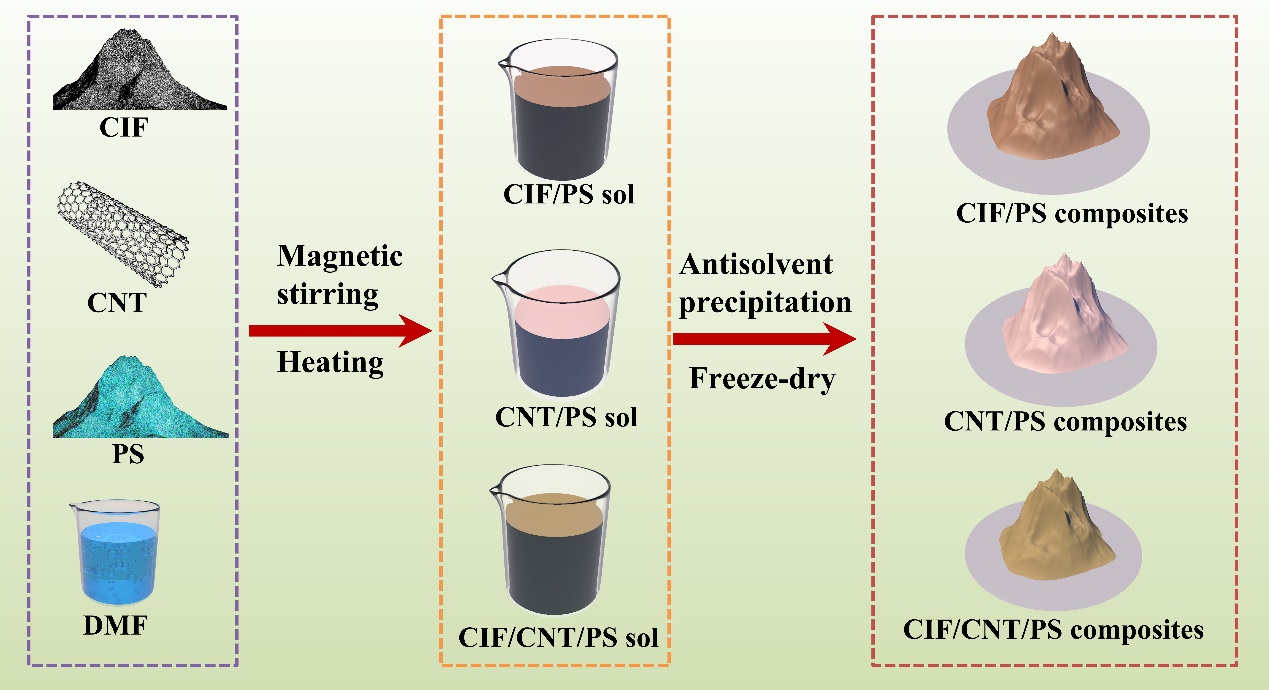
**

Fig.S1 Schematic diagram preparation process of CIF/PS, CNT/PS and CIF/CNT/PS composites

**2. Design theory for EMWA of multilayer system**

Fig.S2 presents a multilayer-model that contains n layers of different materials while a metal backplate is used as its reflective backing. RL of multilayer-model is defined as in the following equations:

(1)

(2)

Where *Zri* is the impedance of the standard absorber, *η0* is the is the characteristic impedance of the free space, *f* is the frequency of the incident electromagnetic wave, *d* is the thickness of the standard absorber, *c* is the propagation speed of the EMWs in free space, *μr* is the complex permeability of absorber (*μr=μ'-jμ''*), *εr* is the complex permittivity (*εr = ε' − jε''*). The frequency range with RL values below -10 dB refer to the effective absorption bandwidth (EAB). The lower RL means the stronger EMWA ability, and 90% of the EMW energy is absorbed when the RL is lower than -10 dB.

According to the transmission line theory, for the multilayer-model, the wave impedance *Zi* of the *i* th layer is given by:

(3)

where *ηi* and *γi* are given as Eq.S(4) and S(5)

(4)

(5)

Here *ηi* , *γi* and *di* are the complex intrinsic impedance, the propagation constant and thickness of the *i* th layer (i =1, 2, 3…, n), respectively. *εri* and *µri* are the complex relative permittivity and permeability of the *i* th layer, respectively

Because the model is on a metal conductor, which as the reflective backing, the impedance of the short-circuited first layer is given by Eq. S(6):

(6)

where *η1* and *γ1* are the intrinsic impedance and complex propagation constants of the first layer, respectively

Therefore, the EMWA performance of multilayer model consisting of *n* layers of different materials can be calculated by Eqs. S(1) - S(6).


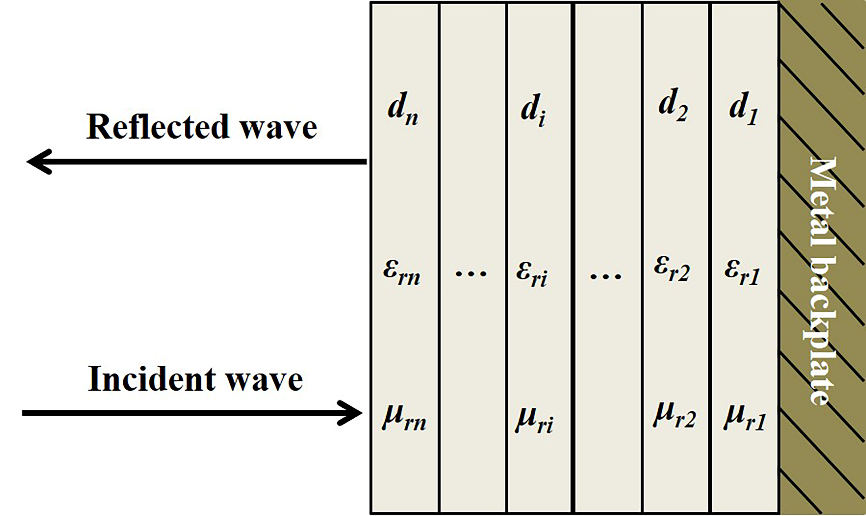


Fig.S2 Schematic of a multilayer model with a normally incident wave

**3.The cell size and cell density of prepared composites foams**

Cell size analysis was conducted using ImageJ (National Institute of Health) and more than 300 cells were tested in FESEM images. The cell density was calculated using Eq.(7):

(7)

where *N* is the cell density (cells/cm3), *n* is the number of cells counted from a collection of image. *M* is the magnification and A is the area of the corresponding observed zone.

Fig.S3 shows the cell size and cell density of prepared composites foams. It shows that the cell size and density distribution reveal that 6CNT foam possesses the about 2.5 μm of the smallest average pore size with the highest pore density, whereas 50CIF foam exhibits the about12 μm of largest cell size and lowest density. The blended configuration 50CIF/6CNT foam shows a monomodal cell distribution with an average size of about 9.1 μm, while the layered configuration 50CIF-6CNT foam displays a bimodal pore structure with an overall higher cell density than the blended counterpart.

**~~
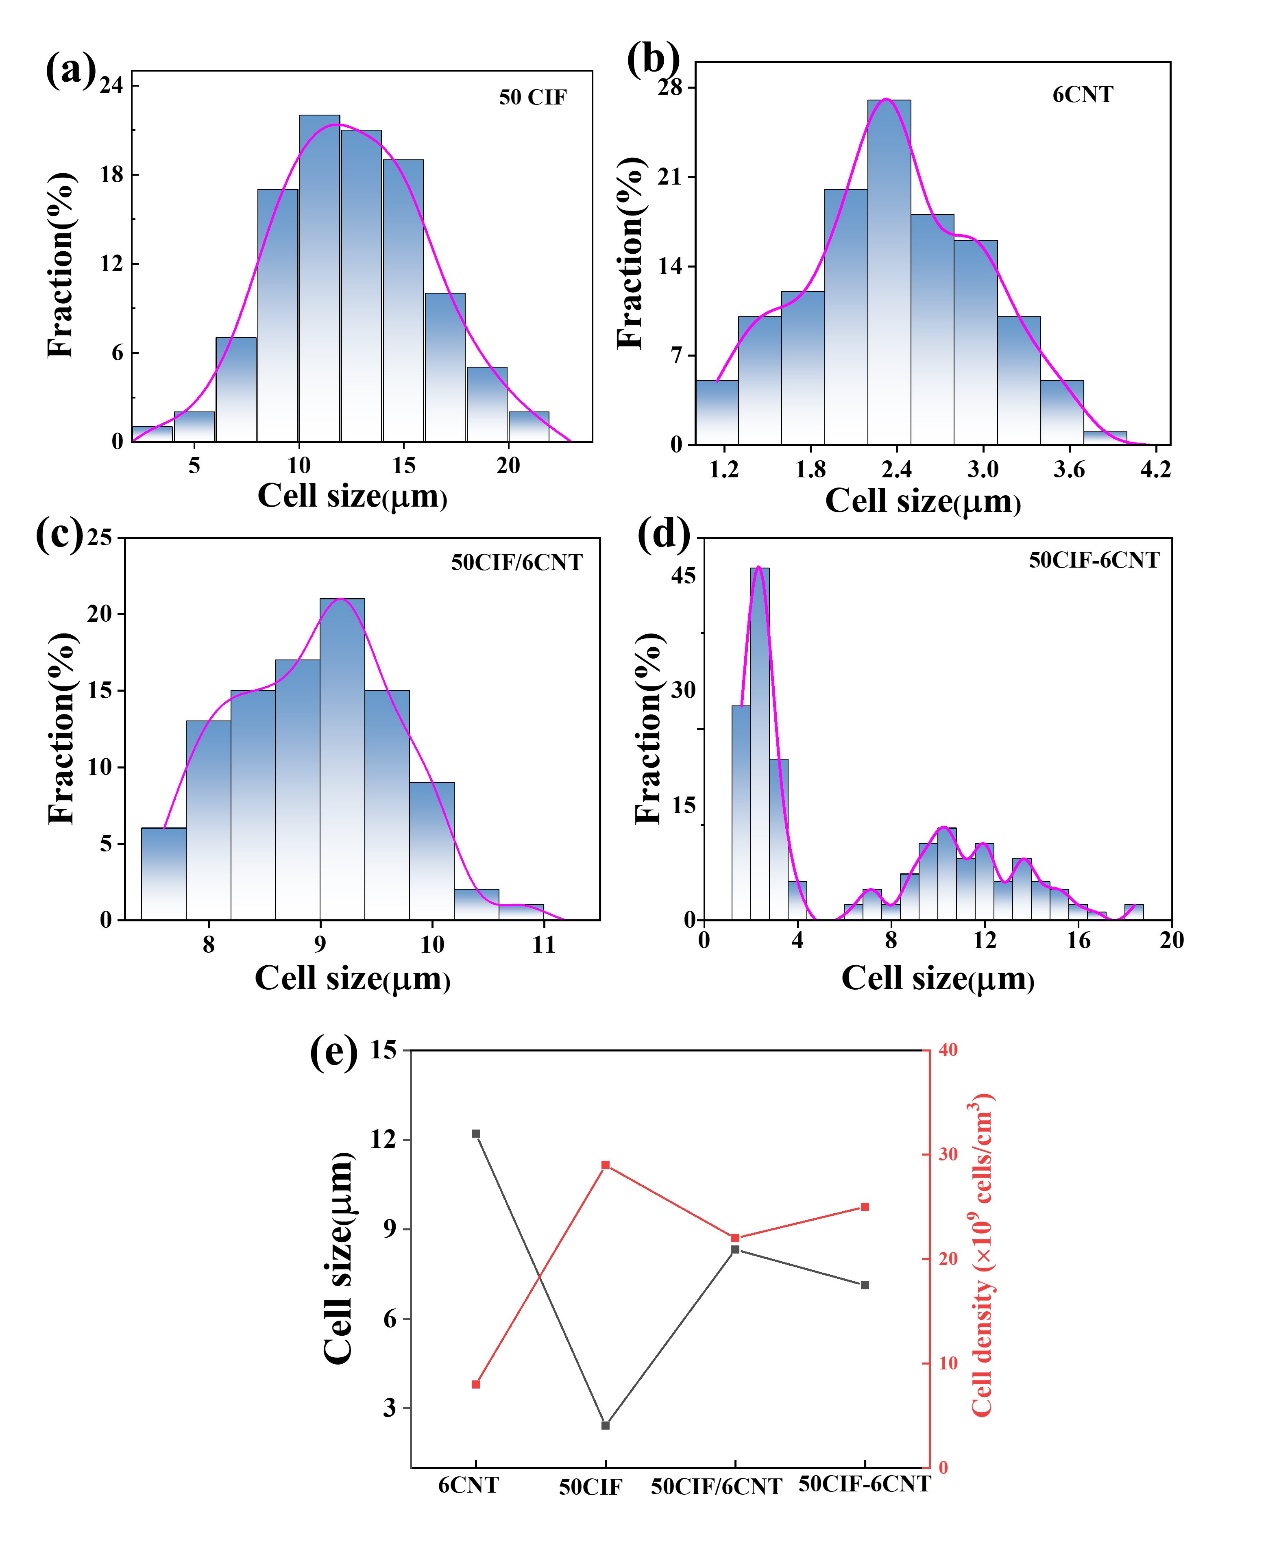
~~**

Fig.S3 Cell size distribution and cell density of prepared composites foams

**4.The Cole-Cole curve of prepared composites foams**

Generally, the polarization relaxation process of a material can be described by the Debye theory [1]. If the curve plotted by ε′ and ε″ will form the shape of a semicircle, with each semicircle representing a Debye relaxation process. Some studies revealed that the Cole-Cole curve may be affected by conductance, showing irregular semicircular forms [2,3]. Each irregular semicircular form reflects a polarization process. From the Cole-Cole diagram Fig.S4 (g-i), we can find that the irregular semicircular are existing in 50CIF, but the value is very weak, so the relaxation process is not given key consideration for 50CIF. The 6CNTs shows the most Cole-Cole semicircles, but accompanying with shortcoming of seriously impedance mismatching have been analyzed in our previous work [25]. A long and straight line and irregular semicircular are occur simultaneously in Fig.5(i), which can be attributed to its conduction loss origin from CNT component, and polarization loss mainly between CNT and CIF component. According to the above results, blending configuration 50CIF/6CNT as magnetic-electro system show better dielectric and magnetic loss capacity, and prominent impedance matching than pure 6CNT and 50CIF.


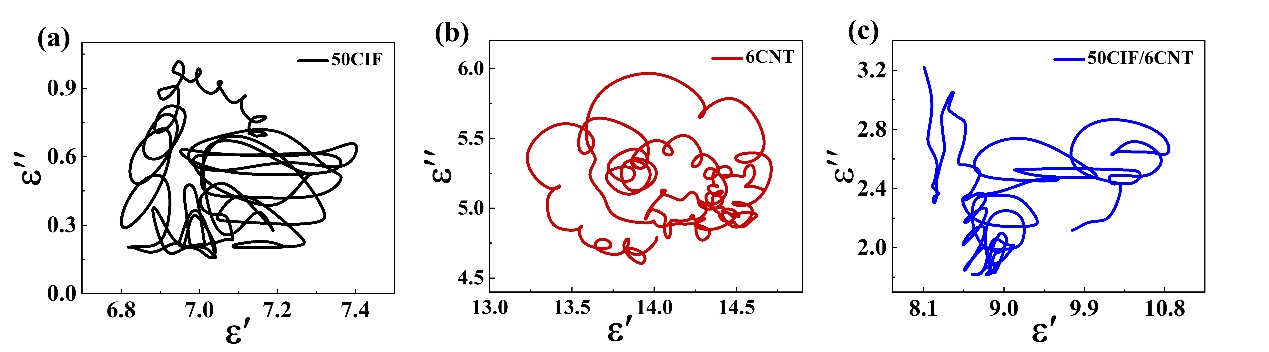


Fig.S4 Cole-Cole curves of 50CIF, 6CNT and 50CIF/6CNT composites foams

**Reference**

[1] Z.L. Chen, J.H. Zhang, L.Y. Ni, D.H. Sheng, R. Gao, W.J. Li, et al. Improving electromagnetic wave absorption property of metal borides/carbon nanocomposites by magnetic-electric balance and ion substitution tuning strategy. Carbon, 221 (2024) 118901.

[2] C. Han, M. Zhang, W.Q. Cao, M.S. Cao, Electrospinning and in-situ hierarchical thermal treatment to tailor C-NiCo2O4 nanofibers for tunable microwave absorption. Carbon, 171 (2021) 953-962.

[3] M.S. Cao, W.L. Song, Z.L. Hou, B. Wen, J. Yuan, The effects of temperature and frequency on the dielectric properties, electromagnetic interference shielding and microwave-absorption of short carbon fiber/silica composites. Carbon, 48 (2010) 788-796.

1. Corresponding author. E-mail address: dfzhou@wit.edu.cn (D.F. Zhou) [↑](#footnote-ref-1)
2. Corresponding author. E-mail address: sqqf@263.net (Q. Shen) [↑](#footnote-ref-2)
